# Supplementary material for: Necroptotic Signaling Orchestrates GBM Malignancy and Potentiates Temozolomide Response
Source: Research Square preprint supplement (doi:10.21203/rs.3.rs-7286420/v1), 2025-09-17

Fig. S2A anti-RIPK1

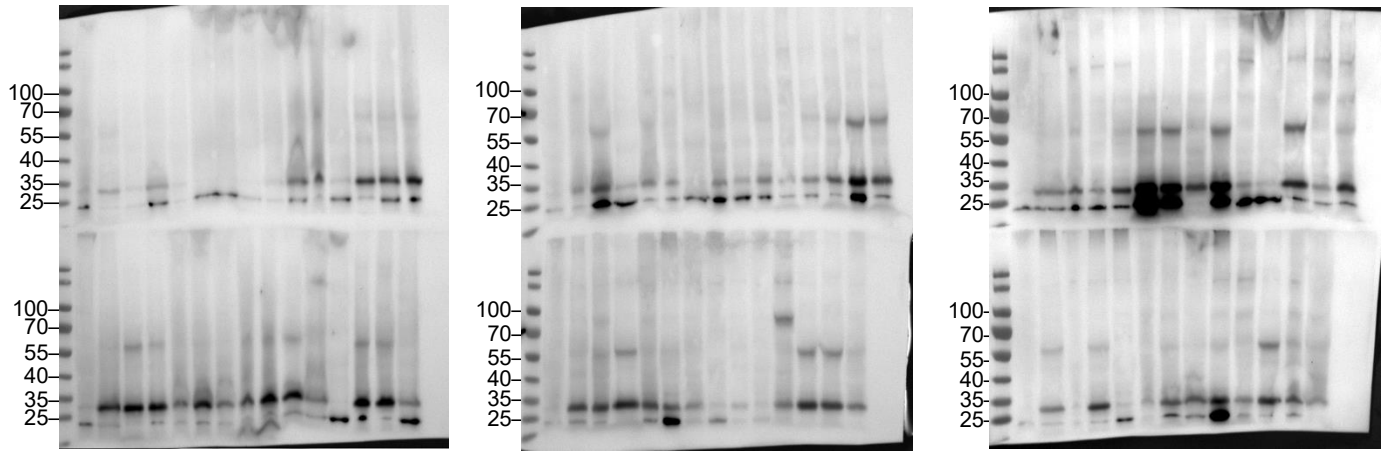

Fig. S2A anti-Actin

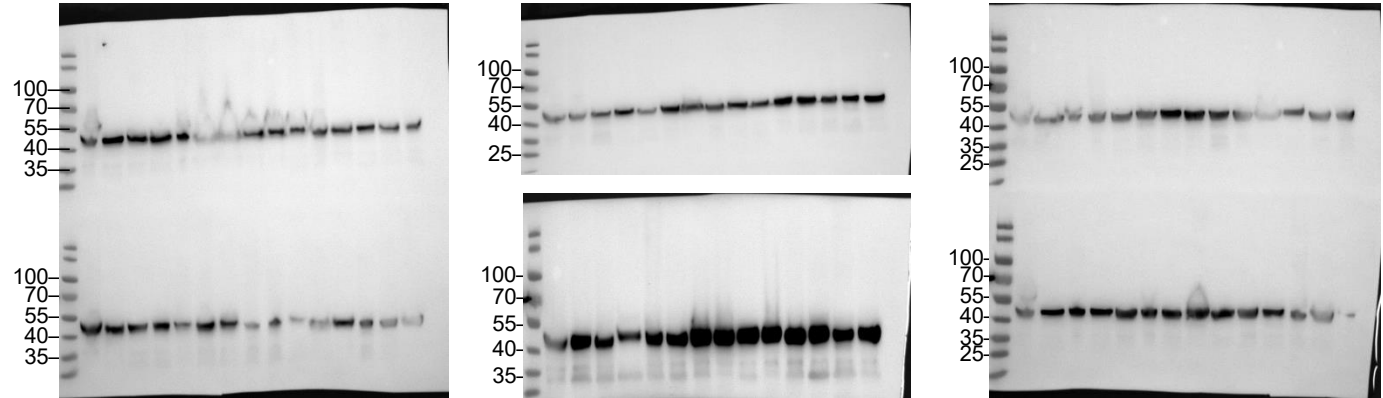

Fig. S2B anti-RIPK3

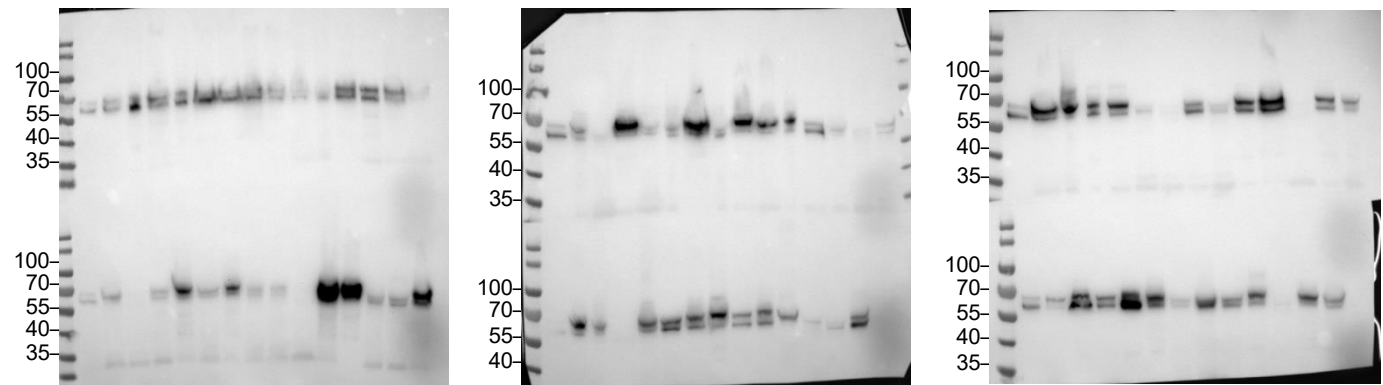

Fig. S2B anti-Actin (RIPK3)

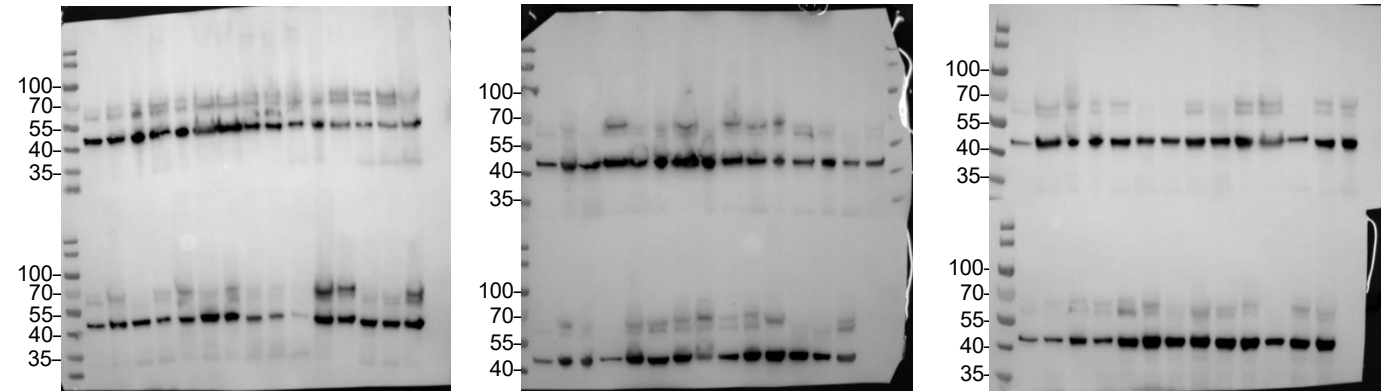

Fig. S2B anti-MLKL

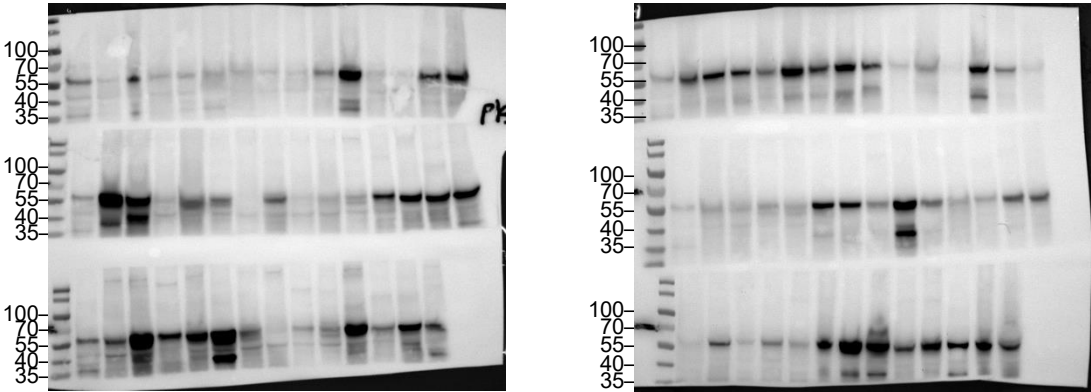

Fig. S2B anti-Actin (MLKL)

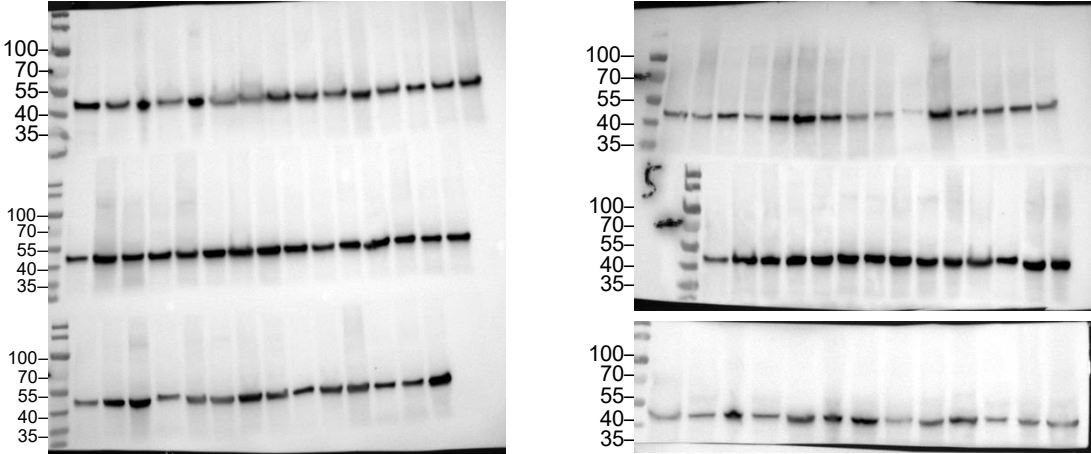

Supplement: Supplementary file 1 [file ca2a08133e8d48e4180e30df.pdf]
